# Supplementary material
Source: bioRxiv or medRxiv preprint supplement (https://www.biorxiv.org/highwire/filestream/66049/field_highwire_adjunct_files/7/216754-7.pdf)

# Supplementary Figure 7

## Type I and II:

AIM2, CCL5, EPSTI1, ETV7, GBP4, HCP5,  
HLA-F, IFI35, IRF7, ISG20, MX2, NMI,  
OAS2, PSMB8, RARRES3, SLC15A3, SP100,  
TMEM140, TRIM21, TRIM22, XAF1

## Type I-II and III:

BATF2, BST2, IFI6, OAS1, PARP9, SP110

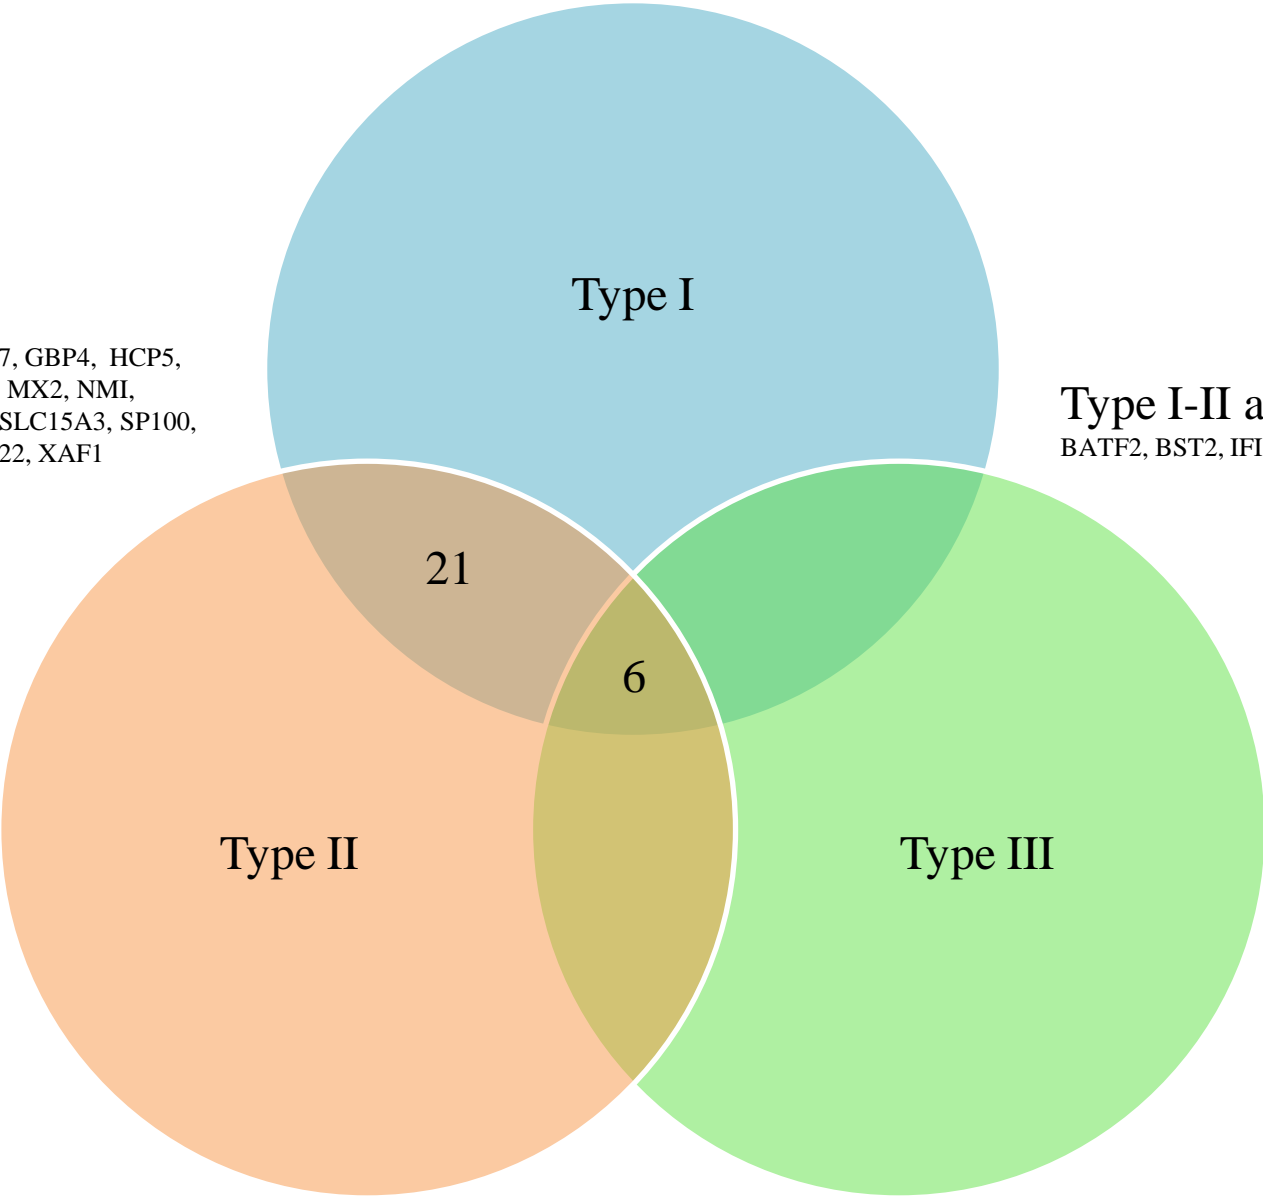

Supplement: Supplementary file [file 216754-7.pdf]
